# Supplementary material for: Pulmonary delivery of curcumin-loaded glycyrrhizic acid nanoparticles for anti-inflammatory therapy
Source: Royal Society of Chemistry journal article supplement (doi:10.1039/d2bm00756h), 2022-01-01
Supplement: d2bm00756h1.pdf [file d2bm00756h1.pdf]

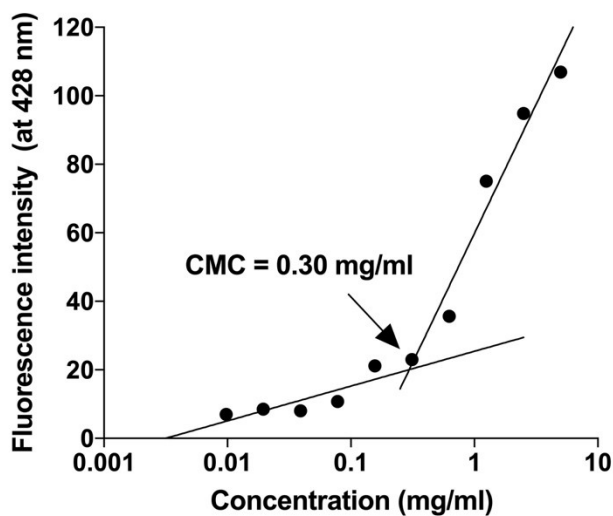

**Supplementary Figure 1. CMC of GA with cholesterol.**

GA with cholesterol (GA-Chol) was prepared at a 5:1 weight ratio. The CMC of the GA-Chol micelles was determined by DPH assay.

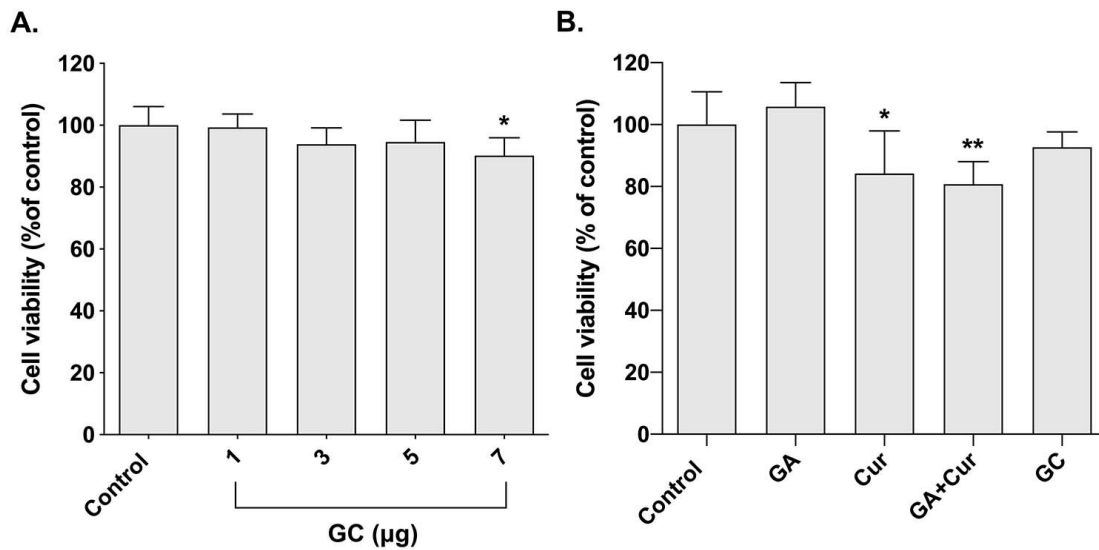

**Supplementary Figure 2. Cytotoxicity of GA-Cur.**

**(A) Dose-dependent toxicity.** L2 cells were treated with various amounts of GA-Cur for 24 h. The cell viability was measured by MTT assay. The data are expressed as the mean  $\pm$  standard deviation of sextuplicate experiments. \* $P < 0.05$  compared with control but not statistically significant compared with the other doses.

**(B) Comparison of toxicities.** L2 cells were treated with GA, Cur, GA+Cur, and GA-Cur for 24 h. The cell viability was measured by MTT assay. The data are expressed as the mean  $\pm$  standard deviation of octuplicate experiments. \* $P < 0.05$  compared with control and GA. \*\* $P < 0.01$  compared with control and GA.
